# Supplementary material for: Using the MCF10A/MCF10CA1a Breast Cancer Progression Cell Line Model to Investigate the Effect of Active, Mutant Forms of EGFR in Breast Cancer Development and Treatment Using Gefitinib
Source: PLoS One. 2015 May 13;10(5):e0125232. doi: 10.1371/journal.pone.0125232 (PMC4430383; doi:10.1371/journal.pone.0125232)
Supplement: S7 Table — (XLSX) [file pone.0125232.s013.xlsx]

## Sheet: Table 1
Table S7. Top diseases and molecular functions for the gene list of MCF10A and MCF10CA damaging variants from Ingenuity Pathway Analysis
Cell line	Disease or Function	p-value	# molecules
MCF10CA1a	Diseases
	Dermatological Diseases and Conditions	6.33E-06 - 1.88E-02	14
	Inflammatory Disease	6.33E-06 - 1.88E-02	9
	Cancer	2.08E-05 - 1.96E-02	45
	Gastrointestinal Disease	2.08E-05 - 1.68E-02	30
	Neurological Disease	4.42E-05 - 1.97E-02	16
	Molecular and Cellular Functions
	Cell Death and Survival	6.94E-06 - 1.86E-02	17
	Cellular Movement	2.08E-05 - 1.97E-02	14
	Cell Cycle	4.15E-05 - 1.85E-02	7
	Cellular Assembly and Organization	1.45E-04 - 1.93E-02	12
	Cell-To-Cell Signaling and Interaction	5.73E-04 - 1.85E-02	11
	Associated Network Functions	Score
	Cell-To-Cell Signaling and Interaction, Cancer, Organismal Injury and Abnormalities	116
MCF10A	Diseases
	Cancer	3.89E-05 - 4.34E-02	25
	Dermatological Diseases and Conditions	3.89E-05 - 4.59E-02	9
	Auditory Disease	1.89E-04 - 1.17E-02	4
	Neurological Disease	1.89E-04 - 4.97E-02	12
	Organismal Injury and Abnormalities	2.62E-04 - 4.47E-02	23
	Molecular and Cellular Functions
	Cell Morphology	5.23E-05 - 4.54E-02	9
	Cellular Assembly and Organization	4.81E-04 - 3.59E-02	12
	Cellular Function and Maintenance	4.81E-04 - 4.34E-02	8
	Cellular Movement	4.81E-04 - 4.59E-02	5
	Molecular Transport	4.81E-04 - 4.34E-02	8
	Associated Network Functions	Score
	Cancer, Dermatological Diseases and Conditions, Cellular Movement	53
	Cancer, Organismal Injury and Abnormalities, Reproductive System Disease	3

## Sheet: Sheet1
Cancer	3.89E-05 - 4.34E-02	25
Dermatological Diseases and Conditions	3.89E-05 - 4.59E-02	9
Auditory Disease	1.89E-04 - 1.17E-02	4
Neurological Disease	1.89E-04 - 4.97E-02	12
Organismal Injury and Abnormalities	2.62E-04 - 4.47E-02	23
Cell Morphology	5.23E-05 - 4.54E-02	9
Cellular Assembly and Organization	4.81E-04 - 3.59E-02	12
Cellular Function and Maintenance	4.81E-04 - 4.34E-02	8
Cellular Movement	4.81E-04 - 4.59E-02	5
Molecular Transport	4.81E-04 - 4.34E-02	8
Cancer, Dermatological Diseases and Conditions, Cellular Movement
Cancer, Organismal Injury and Abnormalities, Reproductive System Disease
